# Supplementary material
Source: PubMed Central journal article supplement (PMC6904746)
Supplement: mmc1.pdf [file mmc1.pdf]

YMTHE, Volume 27

## **Supplemental Information**

**A Randomized, Double-Blind, Placebo-Controlled**

**Phase II Study of Hepatocyte Growth Factor**

**in the Treatment of Critical Limb Ischemia**

**Yongquan Gu, Shijun Cui, Qi Wang, Changjian Liu, Bi Jin, Wei Guo, Changwei Liu, Tongbin Chu, Chang Shu, Fuxian Zhang, Chengquan Han, and Yue Liu**

# Supplement Materials

**Graph 1 Amputation Free Comparative Data**

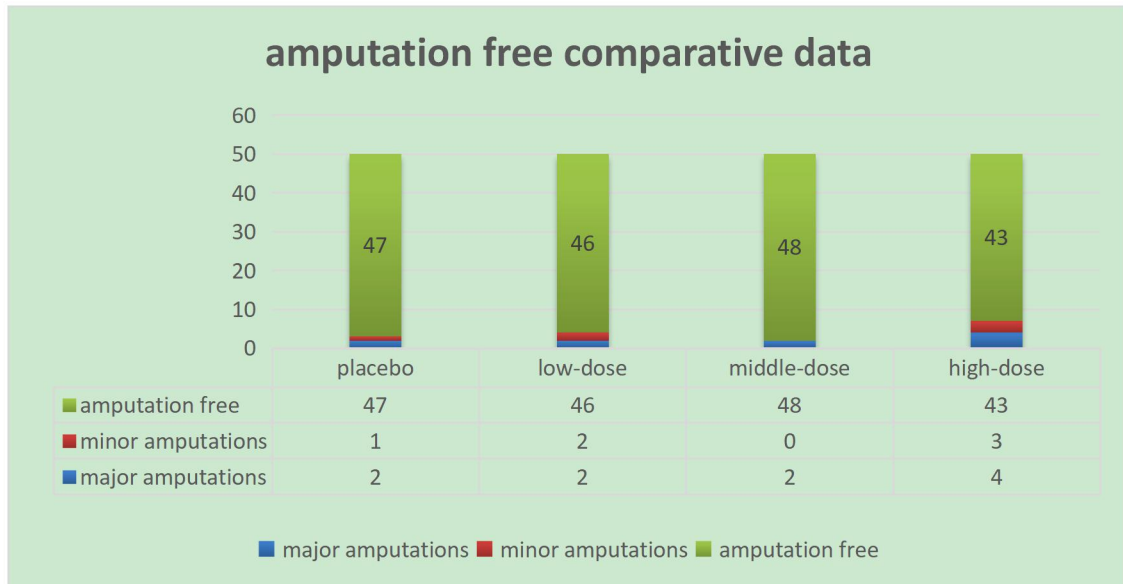

## Graph 2 Legend of Injection Site

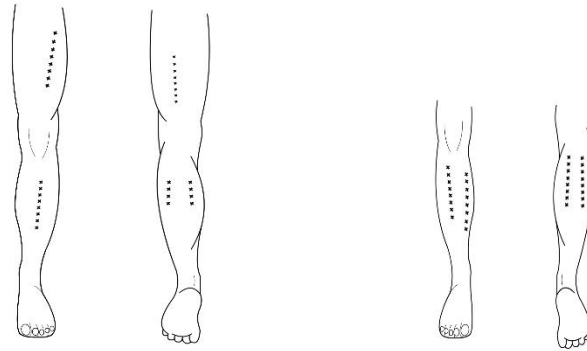

**Legend of injections selection:**32 injection sites marked with “x” were selected totally for each patients.  
Each adjacent 8 injection sites were grouped, and the gap between injection sites was less than 2 cm.

### Graph 3 Ulcer Healing on Days 0, 90 and 180

Photographs of ulceration area of two patients(A and B) were captured on days 0,90 and 180 for comparison

A:

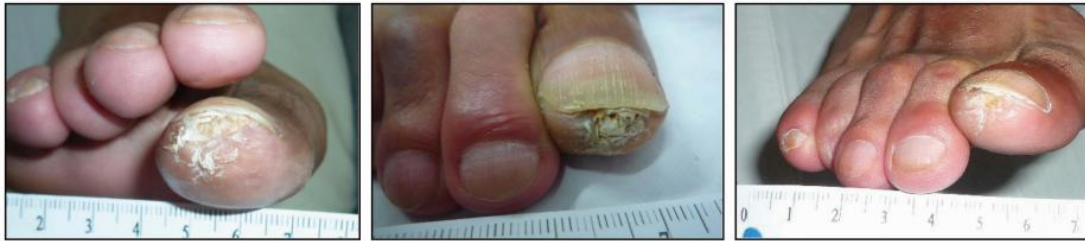

D0

D90

D180

B:

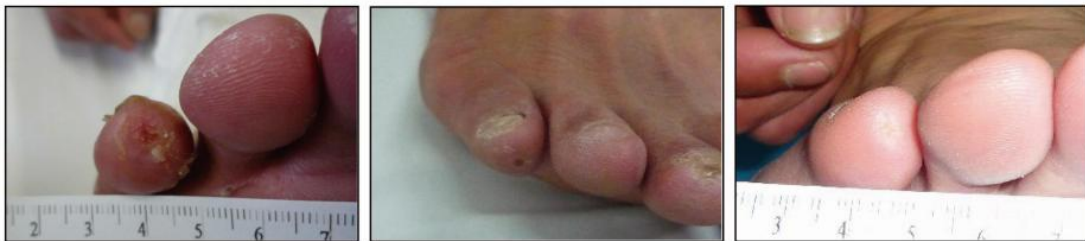

D0

D90

D180

**Table 1 Difference test between groups of anticoagulants or not**

| Using of anticoagulants | Placebo | Low dose | Medium dose | High dose |
|-------------------------|---------|----------|-------------|-----------|
| No                      | 37      | 36       | 39          | 34        |
| Yes                     | 13      | 14       | 11          | 16        |
| Statistic value         | 1.3191  |          |             |           |
| P-value                 | 0.7246  |          |             |           |

**Table 2 Difference test between groups of drug combination**

| Using of anticoagulants<br>and antiplatelet | Placebo | Low dose | Medium dose | High dose |
|---------------------------------------------|---------|----------|-------------|-----------|
| No                                          | 41      | 40       | 44          | 42        |
| Yes                                         | 9       | 10       | 6           | 8         |
| Statistic value                             | 1.2702  |          |             |           |
| P-value                                     | 0.7362  |          |             |           |

| <b>Table 3 rate of complete pain relief in ASO patients</b> |    |                                  |         |
|-------------------------------------------------------------|----|----------------------------------|---------|
| group                                                       | N  | Completely relief of pain, n (%) | P       |
| Placebo                                                     | 31 | 2(6.45)                          |         |
| Low dose                                                    | 33 | 16(48.48)                        | 0.0005  |
| Middle dose                                                 | 30 | 16(53.33)                        | <0.0001 |
| High dose                                                   | 30 | 15(50.00)                        | 0.0007  |

| <b>Table 4 rate of complete pain relief in TAO patients</b> |    |                                  |       |
|-------------------------------------------------------------|----|----------------------------------|-------|
| group                                                       | N  | Completely relief of pain, n (%) | P     |
| Placebo                                                     | 15 | 1(6.67)                          |       |
| Low dose                                                    | 14 | 7(50.00)                         | 0.014 |
| Middle dose                                                 | 18 | 11(61.11)                        | 0.003 |
| High dose                                                   | 18 | 11(61.11)                        | 0.003 |



| <b>Table5 rate of complete ulcer healing in ASO patients</b> |    |                                        |        |
|--------------------------------------------------------------|----|----------------------------------------|--------|
| group                                                        | N  | Completely healed of ulceration, n (%) | P      |
| Placebo                                                      | 14 | 2(14.29)                               |        |
| Low dose                                                     | 10 | 4(40.00)                               | 0.3408 |
| Middle dose                                                  | 10 | 5(50.00)                               | 0.0850 |
| High dose                                                    | 5  | 3(60.00)                               | 0.0844 |

| <b>Table 6 rate of complete ulcer healing in TAO patients</b> |    |                                        |        |
|---------------------------------------------------------------|----|----------------------------------------|--------|
| group                                                         | N  | Completely healed of ulceration, n (%) | P      |
| Placebo                                                       | 8  | 4(50.00)                               |        |
| Low dose                                                      | 9  | 4(44.44)                               | 1.0    |
| Middle dose                                                   | 13 | 7(53.85)                               | 1.0    |
| High dose                                                     | 13 | 9(69.23)                               | 0.6458 |
